# Supplementary material
Source: ML conference proceedings conference paper supplement (https://openreview.net/forum?id=calKOSmBxj)
Supplement: supplementary_material [file attachment]

## 376 A Author Statement

377 We have released HoK3v3 - the Honor of Kings 3v3 Arena - as an open-source project under  
378 the Apache License V2.0. The relevant code and gamecore can be found at [https://github.com/tencent-ailab/hok\\_env](https://github.com/tencent-ailab/hok_env), while detailed documentation for HoK3v3 is available at [https://doc.aiarena.tencent.com/paper/hok3v3/latest/hok3v3\\_env/honor-of-kings/](https://doc.aiarena.tencent.com/paper/hok3v3/latest/hok3v3_env/honor-of-kings/). All  
379 experiments can be replicated using the source code, inclusive of hyperparameters and configurations.  
380 The game developers of Honor of Kings have authorized HoK3v3, and the authors bear all responsibility  
381 in case of violation of rights. We will also ensure data accessibility and provide necessary  
382 maintenance.  
383  
384

## 385 B Environment Details

### 386 B.1 Mechanisms

387 There are two types of mechanisms present in HoK3v3: *Crystal* and *Turret*. Moreover, the Arena  
388 contains two *Turrets* and one *Crystal*. The primary objective for players is to engage in combat to  
389 safeguard their own *Crystal* while simultaneously attempting to destroy the opposing team’s *Crystal*.  
390 The *Crystal* possesses a 90% resistance to damage, and it appears in the map within 10 seconds of  
391 the game’s initiation.

392 *Turrets* are classified into two types: the *Vanguard Turret* and the *Base Turret*. Once the *Vanguard*  
393 *Turret* is destroyed, players can proceed to destroy the *Base Turret*, followed by the final *Crystal*.  
394 Both the *Vanguard Turret* and the *Base Turret* are formed 10 seconds after the game begins. For  
395 the initial 2 minutes, a protection mechanism is in place to safeguard the *Turrets*, allowing them  
396 to withstand 80 points of normal attack damage from heroes. Additionally, *Turrets* enjoy a 55%  
397 damage-free rate in the absence of *Creeps*.

398 Sixty seconds after the commencement of the game, an HP pack will become available behind both  
399 the *Vanguard Turret* and the *Base Turret*, providing heroes with the means to restore their health  
400 points (HP). Once utilized, the HP pack will disappear and subsequently replenish itself every 60  
401 seconds. However, in the event that either *Turret* is destroyed, the regeneration of the HP pack of this  
402 *Turret* itself will cease.

403 The defense attributes of the mechanisms are shown in Table. 3.

Table 3: Defense attributes of the mechanisms.

| Mechanisms             | Basic HP | Growth HP | Basic Armor | Basic Resistance |
|------------------------|----------|-----------|-------------|------------------|
| <i>Vanguard Turret</i> | 6000     | 700       | 200         | 200              |
| <i>Base Turret</i>     | 10000    | 700       | 200         | 200              |
| <i>Crystal</i>         | 8000     | 600       | 200         | 200              |

404 The mechanisms select attack targets according to a consistent rule. If an enemy hero fails to inflict  
405 damage on ally heroes within the *Turret*’s attack range, the *Turret* will prioritize attacking the first  
406 unit that enters its range. Once the initial unit is eliminated, the *Turret* will then proceed to attack  
407 minions, summoned creatures, and heroes, in that order. In cases where units share the same priority,  
408 the *Turret* will direct its attacks towards the nearest unit. However, when an enemy hero inflicts  
409 damage on ally heroes, the *Turret* will focus on the first enemy hero responsible for the damage. This  
410 targeting persists until the enemy hero either exits the attack range or is eliminated.

411 The extent of damage inflicted by the mechanisms will accumulate with each subsequent attack, and  
412 this damage is characterized as physical damage that bypasses any defensive measures. The attacks  
413 performed by these mechanisms are listed in Table. 4.

414 Destroying enemy mechanisms will gain experience and golds, as shown in Table. 4.

Table 4: Attacks performed by mechanisms.

| Mechanisms             | Basic Attack | Attack Bonus | Maximum Attack Bonus | Experience | Gold |
|------------------------|--------------|--------------|----------------------|------------|------|
| <i>Vanguard Turret</i> | 430          | 300          | 1500                 | 100        | 100  |
| <i>Base Turret</i>     | 500          | 300          | 1500                 | 100        | 100  |
| <i>Crystal</i>         | 580          | 300          | 3000                 | 0          | 0    |

## 415 B.2 Creep

416 The creep serves as the primary source of experience and gold in the HoK3v3, constituting the largest  
 417 proportion of these resources within the entire game. It is primarily categorized into two types:  
 418 ordinary creep and super creep. Upon the player's destruction of the *Base Turret*, the ordinary  
 419 creep is substituted with the more formidable super creep. Creep materializes 12 seconds after the  
 420 commencement of the game and subsequently regenerate every 24 seconds.

421 In the first four minutes of the game, the composition of the creep consists of two *Warriors* and two  
 422 *Mages* respectively. As the game progresses, the creep composition changes to include two *Warriors*,  
 423 one *Mage*, and one *Catapult*. Upon the player's destruction of the *Base Turret*, the *Ordinary Creep* is  
 424 replaced by the more formidable *Super Creep*, which is comprised of two *Warriors*, one *Mage*, and  
 425 one *Super Warrior*. The essential attributes of the creep are presented in Table 5.

Table 5: Basic attributes of creep.

| Creep                | Attack | Magic | Armor | Resistance | HP   | Experience | Gold |
|----------------------|--------|-------|-------|------------|------|------------|------|
| <i>Warrior</i>       | 60     | 60    | 0     | 0          | 1860 | 60         | 48   |
| <i>Mage</i>          | 120    | 120   | 0     | 0          | 1545 | 45         | 36   |
| <i>Catapult</i>      | 192    | 192   | 0     | 0          | 2790 | 100        | 84   |
| <i>Super Warrior</i> | 576    | 576   | 183   | 183        | 4185 | 100        | 70   |

## 426 B.3 Jungles

427 The jungles serve as the primary source of experience and gold for *Assassin Heroes* such as "*Zhaoyun*".  
 428 In this particular map, both sides' players have access to the entire jungle area. The jungles contain  
 429 various types of monsters, including normal creatures, the formidable "*Scarlet Statue*," the elusive  
 430 "*Treasure Thief*", and the powerful "*Tyrant*". The spatial distribution of various monster species  
 431 within the jungles can be referenced in Figure. 7. Upon slaying the "*Dark Wolf*," a hero receives the  
 432 "*Forest's Roar*" buff, granting them a 30% increase in movement speed and a 20% reduction in skill  
 433 cooldowns for a duration of 30 seconds. However, this buff dissipates upon the hero's death.

434 Defeating the "*Tyrant*" bestows the hero with the "*Tyrant's Power*." Accumulating multiple "*Tyrant*"  
 435 kills further enhances this power. The effects of slaying the "*Tyrant*" multiple times are as follows:  
 436 the first kill increases the HP recovery of all allies by 1% every 2 seconds, the second kill augments  
 437 the damage inflicted by all allies against enemy mechanisms, and the third kill amplifies the physical  
 438 and magical output of all allies by 30%. For additional information regarding the specifics of the  
 439 jungles, please refer to Table 6.

Table 6: Details about the jungles.

| Creature Name                       | Attack | Magic  | Armor   | Resistance | HP        | Experience | Gold  |
|-------------------------------------|--------|--------|---------|------------|-----------|------------|-------|
| <i>Big / Little Demon Vanguard</i>  | 138 82 | 138 82 | 183 109 | 183 109    | 2480 1488 | 60 30      | 60 30 |
| <i>Big / Little Archer</i>          | 138 82 | 138 82 | 183 109 | 183 109    | 2480 1488 | 60 30      | 60 30 |
| <i>Big / Little White-tail Deer</i> | 138 82 | 138 82 | 183 109 | 183 109    | 2480 1488 | 60 30      | 60 30 |
| <i>Big / Little Dark Wolf</i>       | 138 82 | 138 82 | 183 109 | 183 109    | 2480 1488 | 70 50      | 70 50 |
| <i>Scarlet Statue</i>               | 216    | 216    | 183     | 183        | 3720      | 90         | 90    |
| <i>Treasure Thief</i>               | 204    | 204    | 183     | 183        | 5400      | 160        | 135   |
| <i>Tyrant</i>                       | 204    | 204    | 183     | 183        | 9000      | 300        | 200   |

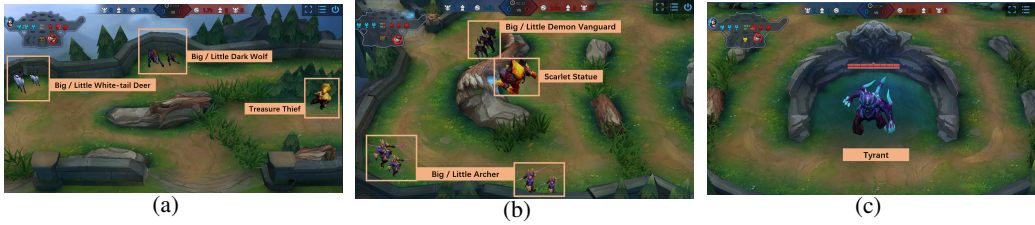

Figure 7: The spatial distribution of various monster species within the jungles.

#### 440 B.4 Heroes

441 In the HoK3v3, we have open-sourced a total of 30 heroes (Fig. 8), which can be classified into three  
 442 types: *Mage*, *Marksmen*, and *Assassin*. Each type consists of 10 heroes. *Mage* and *Marksmen* heroes  
 443 primarily operate in the middle lane, acquiring experience and gold by eliminating opponent heroes  
 444 or creeps. On the other hand, *Assassin* heroes predominantly operate in the jungle, killing monsters  
 445 to obtain gold and experience. Additionally, *Assassin* heroes also venture into the middle lane to col-  
 446 laborate with *Mage* and *Marksmen* heroes in eliminating opponent heroes or destroying *Turrets*. Each  
 447 agent is able to select one hero to control and cooperate with the other two agents. For further details  
 448 regarding hero skills, please consult the website: <https://pvp.qq.com/m/m201706/heroList.shtml>.

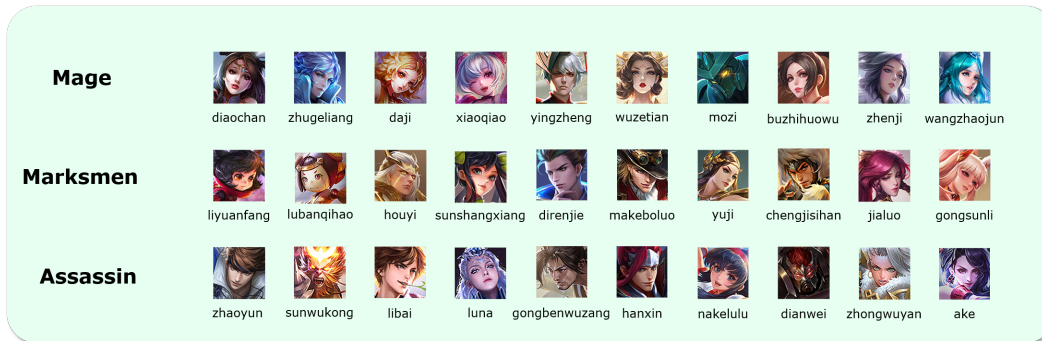

Figure 8: Details of 30 open-sourced heroes.

### 449 C Agent Details

#### 450 C.1 Observation Space

451 In order to enhance the training process and facilitate academic exploration, the HoK3v3 incorporates  
 452 various components, including the intricate game interaction logic, the training framework project,  
 453 and the feature design project. By encapsulating these elements, the HoK3v3 offers comprehensive  
 454 and essential information. The complete observation space dimension comprises 4586, and Table 7  
 455 provides a detailed breakdown of feature categories, descriptions, and dimensions.

#### 456 Note:

- 457 • All the features, except *FeatureWholeInfo*, consist of both absolute information features and  
 458 relative information features. Let us consider *FeatureHero* as an illustrative example. The absolute  
 459 information features, such as hero ID, blood, HP, and attack power, remain consistent for all three  
 460 heroes. On the other hand, the relative information features, such as the x-axis, z-axis, distance, and  
 461 other dimensions pertaining to the current player, vary among the three heroes.
- 462 • The units related to the two sides are presented in the following order: our side and enemy side.  
 463 For example, the *FeatureHero* unit represents [3 heroes on our side, 3 heroes on the enemy side],

464 the *FeatureSoldier* unit represents [10 soldiers on our side, 10 soldiers on the enemy side], and the  
 465 *FeatureOrgan* unit represents [3 turrets on our side, 3 turrets on the enemy side].

466 • Units that are not associated with specific sides are arranged according to the ID of the unit. For  
 467 example, the *FeatureMonster* unit consists of [*Monster 0*, *Monster 1*, ..., *Monster N*], with the *Tyrant*  
 468 unit being positioned last within the *Monster* unit.

Table 7: The categories of features, descriptions, and the dimensions.

| Categories of Features  | Descriptions                                                                                                      | Dimensions | Start Index | End Index |
|-------------------------|-------------------------------------------------------------------------------------------------------------------|------------|-------------|-----------|
| <i>FeatureImg</i>       | Image-like features, including 6 channels such as obstacle channel and grass channel.                             | 6*17*17    | 0           | 1733      |
| <i>FeatureHero</i>      | From vision of the current player, state information of 6 heroes from both sides, i.e. hero ID, HP, etc.          | 6*251      | 1734        | 3239      |
| <i>FeatureMainHero</i>  | Private features of the current hero, i.e. whether the enemy hero is within the attack range of the current hero. | 44         | 3240        | 3283      |
| <i>FeatureSoldier</i>   | The state of 20 <i>Creep</i> of allies and enemies: types, HP, positions, etc.                                    | 20*25      | 3284        | 3783      |
| <i>FeatureOrgan</i>     | The state of 6 <i>Turrets</i> : types, HP, positions, etc.                                                        | 6*29       | 3784        | 3957      |
| <i>FeatureMonster</i>   | The state of 20 <i>Monsters</i> : types, HP, positions, etc.                                                      | 20*28      | 3958        | 4517      |
| <i>FeatureWholeInfo</i> | Gold of allies and enemies; kills, surviving turrets, etc.                                                        | 68         | 4518        | 4585      |

## 469 C.2 Action Space

470 The original action space in the HoK3v3 comprises a triad of action buttons: the move direction button,  
 471 the skill offsets on the x- and z-axes button, and the target game units button. This comprehensive set  
 472 encompasses all possible actions that the hero can undertake in a hierarchical fashion.

473 Specifically, the player must make decisions regarding the following aspects:

474 **Selection of action button:** The player needs to determine which action button to choose, such as  
 475 the move button, attack button, skill button, return button, and so on.

476 **Execution details:** The player must specify the precise execution details, including controlling the  
 477 direction of movement and managing the landing position of skills.

478 **Target selection:** The player must decide which target to select for the intended action.

479 Details of the action space can be referred to Table. 8.

## 480 C.3 Legal Action Mask

481 As shown in Table 8, in each time step of an episode, every hero has the option to choose one action.  
 482 However, their choice of action is not arbitrary. Therefore, a legal action mask exists for each time  
 483 step, restricting the hero from selecting illegal actions. The dimension of the legal action mask is the  
 484 same as that of the action when it comes to the action types "*Button*", "*Move*", and "*Skill*". However,  
 485 there is a dependency relationship in the legal action mask between the action types "*Target*" and  
 486 "*Button*": the legal actions of "*Target*" depend on the chosen "*Button*". In other words, only when a  
 487 hero chooses a "*Button*" can they determine the legal actions for "*Target*". Since there are a total of  
 488 13 "*Buttons*" and 7 "*Targets*", the dimension of the legal action mask for "*Target*" is  $13 \times 7$ .



Table 8: Details of the action space.

| Action Type   | Sub Action      | Description                             | Dimension |
|---------------|-----------------|-----------------------------------------|-----------|
| <b>Button</b> | None            | inactive state                          | 1         |
|               | None            | inactive state                          | 1         |
|               | Move            | move hero                               | 1         |
|               | Normal Attack   | cast normal attack                      | 1         |
|               | Skill 1         | cast skill 1                            | 1         |
|               | Skill 2         | cast skill 2                            | 1         |
|               | Skill 3         | cast skill 3                            | 1         |
|               | Skill 4         | cast skill 4 (for specific heroes)      | 1         |
|               | Chosen Skill    | cast chosen skill                       | 1         |
|               | Recall          | return to the base                      | 1         |
|               | Equipment Skill | cast equipment skill                    | 1         |
|               | Heal Skill      | cast heal skill                         | 1         |
|               | Friend Skill    | cast friend skill (for specific heroes) | 1         |
| <b>Move</b>   | Move Dir        | move direction                          | 25        |
| <b>Skill</b>  | Skill X         | skill offsets on the x-axis             | 42        |
|               | Skill Z         | skill offsets on the z-axis             | 42        |
| <b>Target</b> | None            | no target                               | 1         |
|               | Enemy           | 3 enemy heroes                          | 3         |
|               | Friend          | 3 friend heroes                         | 3         |
|               | Self            | own hero                                | 1         |
|               | Monster         | 20 monsters                             | 20        |
|               | Soldier         | 10 closest monsters                     | 10        |
|               | Turret          | the closest turret                      | 1         |

#### 489 C.4 Sub Action Mask

490 Action masking refers to the process of removing certain actions that cannot be executed simul-  
 491 taneously with the current action, resulting in a selection of permissible actions. To facilitate  
 492 comprehension, we present a couple of examples:

493 **Example-1:** Upon choosing the Button-Move action, only the Move Dir sub-actions remain after the  
 494 mask is applied. These sub-actions enable control over the direction of movement, as depicted in  
 495 Fig. 9.

496 **Example-2:** Upon selecting the Button-Normal Attack action, only the Target sub-action remains,  
 497 defining the target of the normal attack after the mask is applied.

498 Similar masking principles apply to other actions as well. It is important to note that the specific  
 499 sub-action masks may vary depending on the heroes and equipment involved. For further information,  
 500 please consult the official website at "<https://pvp.qq.com/web201605/herolist.shtml>".

#### 501 C.5 Reward

502 The design of rewards takes the following factors into consideration:

- 503 • Hero Development: The rewards are based on the golds and experience gained through killing  
 504 monsters and creeps.
- 505 • KDA (Kills, Deaths, and Assists): The rewards are influenced by the player's performance in  
 506 terms of kills, deaths, and assists.
- 507 • Hero's State: The rewards are tied to the hero's remaining HP (Health Points).
- 508 • Game Progression: The rewards are determined by the destruction of Turrets and the Crystal.

For specific details regarding the design of rewards, please refer to Table 10.

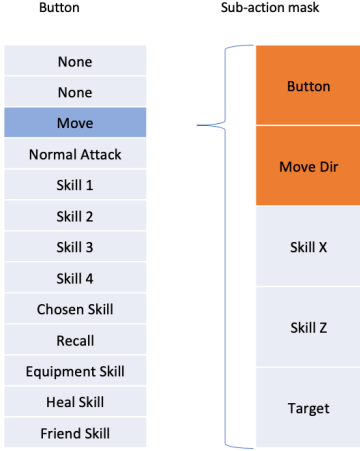

| Reward Factors            | Descriptions               | Weights |
|---------------------------|----------------------------|---------|
| <i>hp_rate_sqrt_sqrt</i>  | the fourth root of Hp rate | 1.0     |
| <i>money</i>              | economic growth            | 0.001   |
| <i>exp</i>                | experience growth          | 0.001   |
| <i>tower</i>              | HP of own <i>Turret</i>    | 1.0     |
| <i>killCnt</i>            | kill count                 | 1.0     |
| <i>DeadCnt</i>            | dead count                 | -1.0    |
| <i>assistCnt</i>          | assist count               | 1.0     |
| <i>total_hurt_to_hero</i> | damage to heroes           | 0.1     |
| <i>atk_monster</i>        | attack monster             | 0.1     |
| <i>win_crystal</i>        | destroy enemy crystal      | 1.0     |
| <i>atk_crystal</i>        | attack enemy crystal       | 1.0     |

Figure 10: The specific design of rewards.

Figure 9: Sub Action mask after selecting the Button-Move action.

509

510 When it comes to calculating the final reward, we employ a "zero-sum" approach wherein the average  
 511 reward of the enemy camp is subtracted. The individual hero reward is determined by applying  
 512 weights, which can be referenced in Table 10. As demonstrated in Equation 1, the final reward is  
 513 obtained by utilizing each hero’s  $hero_{reward_{zero\_sum}}$  value.

$$\begin{aligned}
 hero_{reward} &= w_1 r_1 + w_2 r_2 + \dots + w_n r_n \\
 team_{reward} &= \frac{1}{3} \sum_{i=1}^3 hero_{reward} \\
 hero_{reward_{zero\_sum}} &= \begin{cases} hero_{reward} - team_{reward_{camp2}}, & \text{if hero in camp1} \\ hero_{reward} - team_{reward_{camp1}}, & \text{if hero in camp2} \end{cases}
 \end{aligned} \tag{1}$$

514 **C.6 Comparison with related works**

Table 9: A detailed comparison of HoK3v3 and other related works.

|                                  | Observation Space | Action Space | Focus                   | Heterogeneity <sup>†</sup> |
|----------------------------------|-------------------|--------------|-------------------------|----------------------------|
| Google Research Football         | 115*              | 19           | Cooperation             | ✗                          |
| StarCraft Multi-Agent Challenge  | 16-336            | 7-70         | Cooperation             | o                          |
| Multi-agent MuJoCo               | ≤376              | ≤17          | Cooperation             | o                          |
| Multi-agent Particle Environment | ≤20**             | ≤10**        | Cooperation&Competition | ✗                          |
| Melting Pot                      | 88x88x3           | 6***         | Cooperation&Competition | ✗                          |
| HoK Arena                        | 491               | 83           | Competition             | ✓                          |
| <b>HoK3v3 (Ours)</b>             | 4586              | 161          | Cooperation&Competition | ✓                          |

<sup>†</sup> ✗ symbolizes homogeneity, "o" indicates only numerical heterogeneity, and ✓ denotes true heterogeneity.

\* The floats representation proposed in the original paper.

\*\* Estimations for common scenarios.

\*\*\* Common movement actions proposed in original paper.

515 **D Elo Details**

516 The Elo rating system is a common ranking system used in competitive matches[2]. Here is the  
 517 calculation method of the Elo rating system used in this article:

518 1. Each model has an Elo rating, which represents their skill level in the competition. The initial Elo  
519 rating of each model is 1500.

520 2. In each match, the expected probability of winning for each model is calculated based on their Elo  
521 rating difference. The formula for expected probability is:

$$E_a = \frac{1}{1 + 10^{\left(\frac{R_b - R_a}{400}\right)}} \quad (2)$$

522

$$E_b = 1 - E_a \quad (3)$$

523 where ' $R_a$ ' and ' $R_b$ ' are the ELO ratings of the two models.

524 3. After each match, the Elo ratings of the two models are updated based on the actual result. If  
525 model A wins, its actual score  $S_a$  is 1 and model B's actual score is 0. The formula for updating Elo  
526 rating is:

527

$$R'_a = E_a + K \times (S_a - E_a) \quad (4)$$

$$R'_b = R_b + K \times ((1 - S_a) - E_b) \quad (5)$$

528 where  $K$  is a constant that determines the amount of change in Elo rating after each match. In this  
529 article,  $K = 40$ .

530 4. In this article, each model plays 128 matches against other models, and the win-loss records are  
531 shuffled randomly. The Elo ratings are updated based on the shuffled win-loss records, and this step  
532 is repeated for 200 times to calculate the average Elo ratings. This is done to reduce the error caused  
533 by different match orders.

## 534 E Hyperparameters

535 We have included Table. 10, 11, 12 and 13, which present the key hyperparameters utilized in the  
536 relevant experiments. This table encompasses the essential parameters required for conducting the  
537 experiments effectively.

## 538 F Sub-tasks Details

539 In these sub-tasks, we modify the reward function to individual reward item that corresponds  
540 specifically to the given sub-task, with weight as 1, in stead of weighted sum of multiple items. The  
541 concrete details of sub-tasks are as follows:

542 • **Gold:** Obtaining more gold generally provides a significant advantage, as it is the most important  
543 resource in the game. The objective of this sub-task is to collect more gold by destroying enemy units  
544 (heroes, creeps, and turrets) or monsters. The corresponding reward item for this sub-task is 'money'.

545 • **Exp:** Similar to gold, experience points are crucial in the game as they determine the level of  
546 the heroes. Therefore, we have designed this sub-task to modify the objective to focus on gaining  
547 more experience points, which helps heroes level up faster. The corresponding reward item for this  
548 sub-task is 'exp'.

549 • **Kill:** As a competitive game, killing an enemy provides both gold and experience points, while  
550 also temporarily incapacitating the slain enemy, thus granting a significant advantage to the team.  
551 Consequently, we have designed the **Kill** sub-task to specifically train the agents to eliminate enemies  
552 as frequently as possible. The corresponding reward item for this sub-task is 'killCnt'.

553 • **Hurt:** The rate of hurting is another metric that signifies killing enemies, and it carries a more  
554 dense reward. This sub-task serves as an alternative to the **Kill** objective, aiming to maximize the  
555 extent of hurt inflicted. The corresponding reward item for this sub-task is 'total\_hurt\_to\_hero'.

556 • **Turret:** Destroying the turrets of enemies is a crucial sub-goal in the game, as it grants access to  
557 the crystal. We have designed the **Turret** sub-task to enhance players' abilities in destroying enemy  
558 turrets and defending themselves. The corresponding reward item for this sub-task is 'tower'.

Table 10: Hyperparameters.

| Hyperparameters     | Value    |
|---------------------|----------|
| Batch Size          | 288      |
| $\gamma$            | 0.995    |
| LSTM Time Steps     | 16       |
| $\lambda$ in GAE    | 0.95     |
| PPO Clip $\epsilon$ | 0.2      |
| PPO Clip $c$        | 3.0      |
| Optimizer           | Adam     |
| beta1               | 0.9      |
| beta2               | 0.999    |
| eps                 | 1.00E-08 |
| Learning Rate       | 6.00E-04 |

Table 11: Reward weight of "Mages".

| Reward Factors            | Weights |
|---------------------------|---------|
| <i>hp_rate_sqrt_sqrt</i>  | 3.0     |
| <i>money</i>              | 0.005   |
| <i>exp</i>                | 0.0     |
| <i>tower</i>              | 1.0     |
| <i>killCnt</i>            | 1.0     |
| <i>DeadCnt</i>            | 0.0     |
| <i>assistCnt</i>          | 1.0     |
| <i>total_hurt_to_hero</i> | 0.3     |
| <i>atk_monster</i>        | 0.0     |
| <i>win_crystal</i>        | 0.0     |
| <i>atk_crystal</i>        | 0.0     |

Table 12: Reward weight of "Marksmen".

| Reward Factors            | Weights |
|---------------------------|---------|
| <i>hp_rate_sqrt_sqrt</i>  | 3.0     |
| <i>money</i>              | 0.005   |
| <i>exp</i>                | 0.0     |
| <i>tower</i>              | 1.0     |
| <i>killCnt</i>            | 1.0     |
| <i>DeadCnt</i>            | 0.0     |
| <i>assistCnt</i>          | 1.0     |
| <i>total_hurt_to_hero</i> | 0.3     |
| <i>atk_monster</i>        | 0.0     |
| <i>win_crystal</i>        | 0.0     |
| <i>atk_crystal</i>        | 0.0     |

Table 13: Reward weight of "Assassins".

| Reward Factors            | Weights |
|---------------------------|---------|
| <i>hp_rate_sqrt_sqrt</i>  | 3.0     |
| <i>money</i>              | 0.005   |
| <i>exp</i>                | 0.0     |
| <i>tower</i>              | 1.0     |
| <i>killCnt</i>            | 1.0     |
| <i>DeadCnt</i>            | 0.0     |
| <i>assistCnt</i>          | 1.0     |
| <i>total_hurt_to_hero</i> | 0.3     |
| <i>atk_monster</i>        | 0.02    |
| <i>win_crystal</i>        | 0.0     |
| <i>atk_crystal</i>        | 0.0     |

559 • **Monster:** Monsters residing in the jungle play a vital role in enabling heroes to acquire gold  
560 and experience points. Instead of the original objective, we have modified it to focus on attacking  
561 monsters. The corresponding reward item for this sub-task is 'atk\_monster'.

## 562 G Baseline Details

563 **Encoder:** We employ a meticulously designed backbone as our feature extractor, specifically tailored  
564 to handle the extensive observation space. The encoder consists of multiple units dedicated to process-  
565 ing different aspects of the observation. These units encompass a convolution module, responsible for  
566 extracting image-like features, as well as distinct modules for hero, creep, turret, monster, and game  
567 status information. Please refer to the code [https://github.com/tencent-ailab/hok\\_env](https://github.com/tencent-ailab/hok_env) for  
568 the implementation details of the network.

569 **PPO:** We employ Proximal Policy Optimization (PPO) [15] as our baseline algorithm. Specifically,  
570 we adopt the dual-clip version of PPO, which has been empirically validated as effective in similar  
571 environments [22, 20]. Additionally, to address the challenges posed by multi-agent control, we  
572 incorporate the independent learning paradigm [17] and parameter sharing with PPO.

573 **CPPO:** CPPO is a communication-based variant of PPO. This approach shares similarities with the  
574 standard implementation of PPO, with the exception that a portion of the processed feature from each  
575 hero undergoes max-pooling to obtain a shared feature. This shared feature is then utilized by both  
576 the policy and value networks.

577 **MAPPO:** To evaluate the efficacy of the CTDE paradigm, we employ a CTDE variant of PPO, known  
578 as MAPPO [23]. In contrast to independent learning, MAPPO incorporates a unified global value

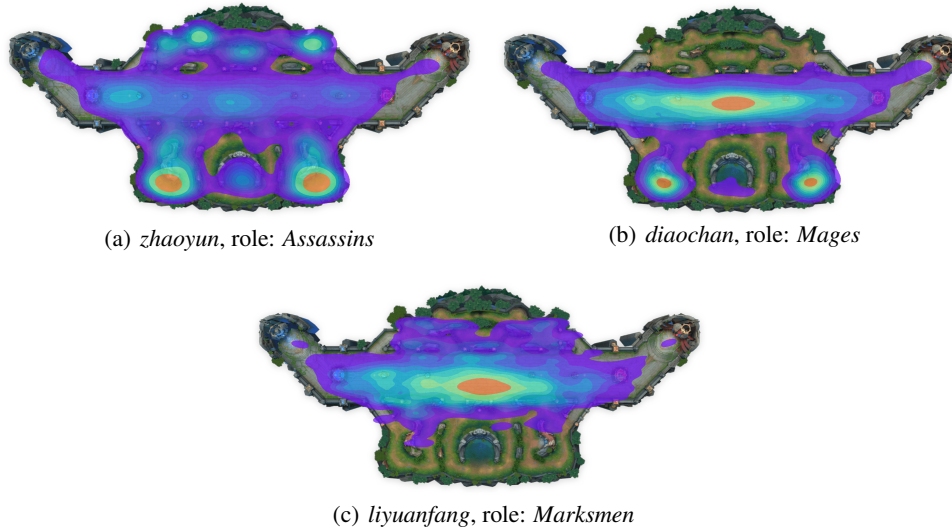

Figure 11: The trajectories of heroes with different roles.

579 network that can access the processed features of all heroes and utilizes the average reward of the  
 580 heroes within a team as a shared reward.

## 581 H Additional Experiments

### 582 H.1 Visualizing Hero Trajectories

583 For the purpose of better illustrating the trajectories of heroes with different roles, namely *Assassins*,  
 584 *Mages*, and *Marksmen*, we have constructed a heatmap utilizing the hero locations of 50 different  
 585 trajectories. These trajectories were generated using the *Level-5 Model* with identical lineups on  
 586 both sides, consisting of *zhaoyun*, *diaochan*, and *liyuanfang*, representing the *Assassins*, *Mages*, and  
 587 *Marksmen* respectively. As depicted in Fig. 11, the heatmap is based on the HoK3v3 map.

588 When examining the *Assassins*, exemplified by *zhaoyun* (Fig. 11(a)), the heatmap illustrates the  
 589 trajectory of *zhaoyun* as it permeates the entire map. This aligns with the role of *Assassins*, who  
 590 are tasked with eliminating monsters throughout the jungle, acquiring gold and experience, and  
 591 collaborating with *Mages* and *Marksmen* to eliminate opposing heroes. In the case of *Mages*,  
 592 represented by *diaochan* (Fig. 11(b)), the heatmap reveals that *diaochan* predominantly remains within  
 593 the middle lane, occasionally venturing into the lower section of the jungle to accrue resources by  
 594 slaying monsters. As for *Marksmen*, embodied by *liyuanfang* (Fig. 11(c)), the heatmap demonstrates  
 595 that *liyuanfang* primarily operates within the middle lane, but occasionally ventures into the upper  
 596 region of the jungle to obtain gold and experience by dispatching monsters.

597 These findings indicate that *Mages*, such as *diaochan*, and *Marksmen*, like *liyuanfang*, strategically  
 598 exploit resources in different areas of the jungle, specifically the lower and upper sections respectively,  
 599 to mitigate competition for jungle resources. In summary, the map is effectively utilized by all three  
 600 hero roles, each exhibiting distinctive characteristics.

### 601 H.2 Ablation Study on Whether to Use Shared Rewards

602 For the experiments conducted in our paper, we utilized the **PPO** and **CPPO** algorithms. In each  
 603 lineup, consisting of three heroes from both sides, we employed separate rewards for training  
 604 purposes. In other words, different heroes within each lineup received distinct rewards during training.  
 605 Consequently, we conducted an ablation study using the **CPPO** algorithm to investigate the impact of  
 606 utilizing averaged shared rewards during the training stage. The results are presented in Fig. 12(a),

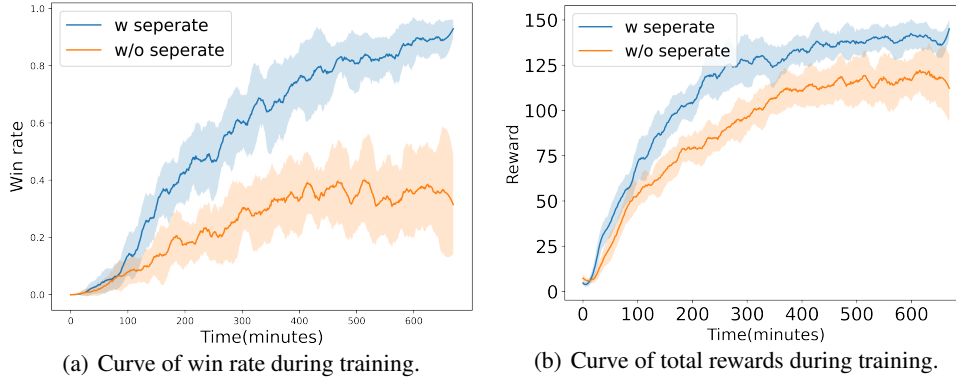

Figure 12: Ablation study on whether to use shared rewards during the training stage under three random seeds. **w seperate**: heroes in every lineup using different rewards. **w/o seperate**: heroes in every lineup using the same averaged rewards.

607 which depicts the winning rate curve during training with both shared and no\_shared rewards. The  
 608 figure clearly illustrates a significant performance drop when using shared rewards, which can be  
 609 attributed to the diverse roles of heroes, such as "Marksmen" and "Mages", who possess distinct  
 610 fighting styles. Therefore, it is appropriate to assign separate rewards to each hero based on their  
 611 specific roles. Additionally, as shown in Fig. 12(b), the total rewards obtained by heroes when using  
 612 shared rewards are substantially lower compared to those using no\_shared rewards. Consequently,  
 613 for all other experiments, we employ no\_shared rewards.

### 614 H.3 Ablation Study on Whether to Use Zero-Sum Rewards

615 As described in Appendix. C.5, all the experiments conducted in our paper utilize zero-sum rewards  
 616 to train, see Equation. 1. Therefore, we have conducted an ablation study to investigate the impact of  
 617 using zero-sum rewards, as depicted in Fig.13. In other words, when employing zero-sum rewards,  
 618 calculations are based on Equation. 1, whereas without zero-sum rewards, Equation. 6 is used.  
 619 Fig. 13(a) demonstrates that during the later stages of training, the *w/o zero-sum* approach performs  
 620 significantly worse than the **w zero-sum** approach, indicating that the utilization of zero-sum rewards  
 621 can enhance the upper limit of the algorithm. Additionally, Fig. 13(b) illustrates that the total rewards  
 622 obtained with zero-sum calculations are fewer compared to those obtained without zero-sum. This  
 623 discrepancy arises from the subtraction of the average reward of the enemy camp (Equation. 1) when  
 624 zero-sum rewards are employed. Consequently, for all the other experiments, we employ zero-sum  
 625 rewards.

$$hero_{reward} = w_1r_1 + w_2r_2 + \dots + w_nr_n \quad (6)$$

### 626 H.4 Ablation Study on Whether to Use Sub-Action Mask

627 As described in Appendix C.4, sub-action mask is utilized to exclude certain *Action Types* that cannot  
 628 be executed simultaneously with the current action. In other words, during each time step, not all  
 629 *Action Types* (Table. 8), namely "Button", "Move", "Skill-X", "Skill-Z" and "Target" are necessary for  
 630 training. Therefore, a sub-action mask is employed to eliminate the irrelevant *Action Types*. Therefore,  
 631 an ablation study is conducted, as illustrated in Fig. 14, to examine the use of the sub-action mask.  
 632 In Fig. 14(a), the winning rate of the *w/o SAM* (without sub-action mask) condition is considerably  
 633 lower than that of the *w SAM* (with sub-action mask) condition. This discrepancy can be attributed to  
 634 the fact that, during the backward stage of *w/o SAM*, gradients of the irrelevant *Action Types* can be  
 635 regarded as noise interfering with the learning process of others. In Fig. 14(b), it can be observed

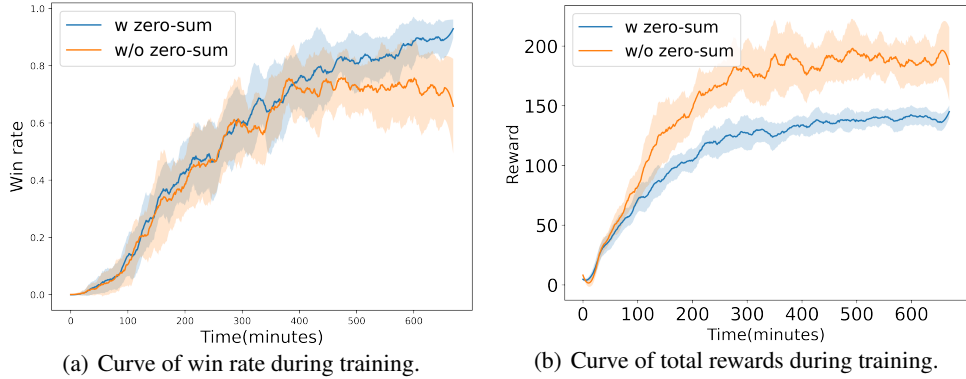

Figure 13: Ablation study on whether to use zero-sum rewards during the training stage under three random seeds. **w zero-sum**: Rewards are calculated by Equation. 1. **w/o zero-sum**: Rewards are calculated by Equation. 6.

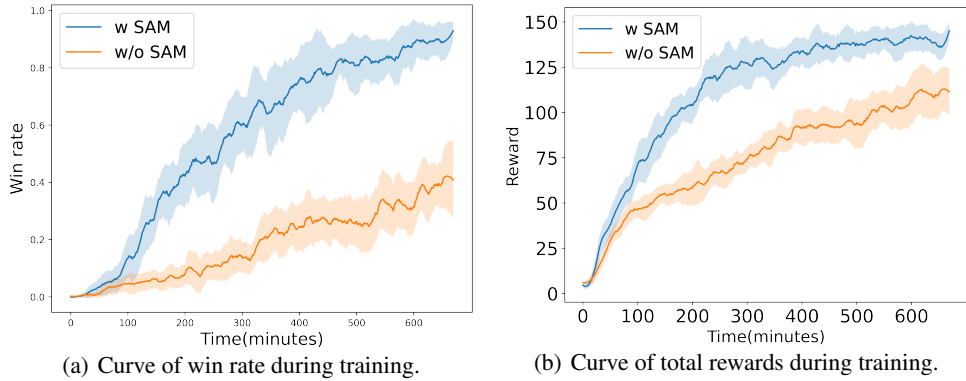

Figure 14: Ablation study on whether to use sub-action mask(SAM) during the training stage under three random seeds. **w SAM**: Using sub-action mask during training. **w/o SAM**: Without sub-action mask during training.

636 that the total rewards obtained in the *w/o SAM* condition are fewer than those achieved in the *w SAM*  
 637 condition, as expected. Consequently, for all the other experiments, we employ the sub-action mask.

## 638 I Limitations and Future Works

639 The complexity and realism of Honor of Kings provide more opportunities for diverse research  
 640 directions, which have not been explored thoroughly and are crucial for our future work. We encourage  
 641 broader community involvement in studying this environment. Besides, We plan to optimize the  
 642 deployment of our environment to fit for multiple platforms and organize more competitions based  
 643 on the Honor of Kings to expand the influence of the Honor of Kings environment and encourage  
 644 research on reinforcement learning.

## 645 J Additional Discussion

### 646 J.1 Discussion on the meaning os sub-tasks

647 Each individual subtask can be conceptualized as a sub-goal, representing a breakdown of the overall  
 648 objective. For instance, the objective of destroying the enemies' crystal can be roughly broken down  
 649 into sub-goals such as acquiring gold and experience points by defeating monsters -> hurt and kill

650 the enemies -> destroying their turrets -> ultimately shattering their crystal. This decomposition of  
651 the main goal has the potential to significantly enhance hierarchical and goal-driven research in multi-  
652 agent reinforcement learning (MARL). Moreover, these sub-goals possess semantic characteristics  
653 that allow them to be effectively linked with LLM agents.
